1 **The core genome <sup>m5</sup>C methyltransferase JHP1050 (M.Hpy99III)**  
2 **plays an important role in orchestrating gene expression in**  
3 ***Helicobacter pylori***

4 Iratxe Estibariz<sup>1,2,3</sup>, Annemarie Overmann<sup>1</sup>, Florent Ailloud<sup>1,2,3</sup>, Juliane Krebs<sup>2</sup>, Christine  
5 Josenhans<sup>1,2,3\*</sup>, Sebastian Suerbaum<sup>1,2,3\*</sup>

6 <sup>1</sup> Medical Microbiology and Hospital Epidemiology, Max von Pettenkofer Institute, Faculty of Medicine,  
7 LMU Munich, München, Germany

8 <sup>2</sup> Institute of Medical Microbiology and Hospital Epidemiology, Hannover Medical School, Hannover,  
9 Germany

10 <sup>3</sup> German Center for Infection Research (DZIF), Munich Site, Munich, Germany  
11  
12

13 \* To whom correspondence should be addressed. Tel: +4989218072801; Fax: -4989218072802; Email: Christine  
14 Josenhans (josenhans@mvp.uni-muenchen.de) or Sebastian Suerbaum (suerbaum@mvp.uni-muenchen.de).

15

16 **ABSTRACT**

17 *Helicobacter pylori* encodes a large number of Restriction-Modification (R-M) systems despite its  
18 small genome. R-M systems have been described as “primitive immune systems” in bacteria, but the  
19 role of methylation in bacterial gene regulation and other processes is increasingly accepted. Every *H.*  
20 *pylori* strain harbours a unique set of R-M systems resulting in a highly diverse methylome. We  
21 identified a highly conserved GCGC-specific <sup>m5</sup>C MTase (JHP1050) that was predicted to be active in  
22 all of 459 *H. pylori* genome sequences analyzed. Transcriptome analysis of two *H. pylori* strains and  
23 their respective MTase mutants showed that inactivation of the MTase led to changes in the  
24 expression of 225 genes in strain J99, and 29 genes in strain BCM-300. 10 genes were differentially  
25 expressed in both mutated strains. Combining bioinformatic analysis and site-directed mutagenesis,  
26 we demonstrated that motifs overlapping the promoter influence the expression of genes directly,  
27 while methylation of other motifs might cause secondary effects. Thus, <sup>m5</sup>C methylation modifies the  
28 transcription of multiple genes, affecting important phenotypic traits that include adherence to host  
29 cells, natural competence for DNA uptake, bacterial cell shape, and susceptibility to copper.

30 **INTRODUCTION**

31 Epigenetics denotes inheritable mechanisms that regulate gene expression without altering the DNA  
32 sequence. In prokaryotes, methyltransferases (MTases) transfer methyl groups from S-adenosyl  
33 methionine to adenines or cytosines within a DNA target motif and so contribute to changes of the  
34 epigenome (1-3). MTases either belong to Restriction-Modification (R-M) systems that include MTase  
35 and restriction endonuclease (REase) activities, or occur as orphan MTases in the absence of a  
36 cognate restriction enzyme (4). Three types of DNA methylation occur in bacteria, N6-methyladenine  
37 (<sup>m6</sup>A), 5-methylcytosine (<sup>m5</sup>C) and N4-methylcytosine (<sup>m4</sup>C) (1,2). So far, the major role allocated to  
38 bacterial R-M systems is self-DNA protection by restriction of incoming foreign un-methylated DNA (5),  
39 and they have thus been described as “primitive immune systems” (6). Other functions have also

40 been attributed to prokaryotic R-M systems (7-9). For example, methylation marks promoter  
41 sequences and alters DNA stability and structure, modifying the affinity of DNA binding proteins and  
42 influencing the expression of genes (10,11). Additionally, disturbance of DNA strand separation by  
43 methylation can have an effect on gene expression (12).

44 Methylation can be involved in multiple bacterial functions. In *Escherichia coli*, the Dam adenine  
45 MTase plays an essential role in DNA replication (13,14). Another well-studied example is the CcrM  
46 MTase from *Caulobacter crescentus* that controls the progression of the cell cycle (15). Furthermore,  
47 phase-variable MTases have been shown to control the regulation of multiple genes in several  
48 different pathogens, including *Haemophilus influenzae*, *Neisseria meningitidis*, and *Helicobacter pylori*  
49 (16-18). These MTase-dependent regulons were termed phasevarions (19). As described previously,  
50 adenine methylation has been shown to play a key role in transcriptional regulation but the influence  
51 of cytosine methylation in gene expression has so far only been investigated in very few studies  
52 (20,21).

53 *H. pylori* infection affects half of the world's population and is a major cause of gastric diseases that  
54 include ulcers, gastric cancer, and MALT lymphoma (22). This gastric pathogen has coexisted with  
55 humans since, at least, 88,000 years ago (23). *H. pylori* strains display an extraordinary genetic  
56 diversity caused in part by a high mutation rate but especially by DNA recombination occurring during  
57 mixed infection with other *H. pylori* strains within the same stomach (24-26). The very high sequence  
58 diversity of *H. pylori* and the coevolution of this pathogen with its human host have caused its  
59 separation into phylogeographic populations, whose distribution reflects human migrations (27-29).

60 Despite its small genome, *H. pylori* is one of the pathogens with the highest number of R-M systems  
61 (30). The development of Single Molecule, Real-Time (SMRT) Sequencing technology has allowed  
62 genome-wide studies of methylation patterns and strongly accelerated the functional elucidation of  
63 MTases and their roles in bacterial biology (31,32). Methylome studies of several *H. pylori* strains  
64 have revealed that every strain carries a different set of R-M systems leading to highly diverse  
65 methylomes (33-36). R-M systems in *H. pylori* were shown to protect the bacterial chromosome  
66 against the integration of non-homologous DNA (e.g. antibiotic resistance cassettes), while they had  
67 no significant effect on recombination between highly homologous sequences, permitting efficient  
68 allelic replacement (9). Despite the diversity of methylation patterns, a small number of target motifs  
69 were shown to be methylated in all (one motif, GCGC) or almost all (3 motifs protected in >99% of  
70 strains) *H. pylori* strains in a study by Vale *et al.*, who tested genomic DNAs purified from 221 *H. pylori*  
71 strains for susceptibility to cleavage by 29 methylation-sensitive restriction enzymes, and in those  
72 studies investigating the methylomes of multiple *H. pylori* strains (33,34,36,37). R-M systems have  
73 also previously been shown to contribute to gene regulation in *H. pylori*; the phase-variable MTase  
74 ModH5 is involved in the control of the expression of virulence-associated genes like *hopG* or *flaA* in  
75 strain P12 (38,39).

76 In the present study, we functionally characterized the role of a highly conserved <sup>m5</sup>C MTase  
77 (JHP1050, M.Hpy99III) in *H. pylori* (40). We show the MTase gene to be part of the *H. pylori* core  
78 genome, present and predicted to be active in all of several hundred *H. pylori* strains representative of  
79 all known phylogeographic populations. Transcriptome comparisons of two *H. pylori* wild-type strains  
80 and their respective knockout mutants demonstrated that JHP1050 has a strong impact on the *H.*  
81 *pylori* transcriptome that includes both conserved and strain-specific regulatory effects. We show that  
82 methylation of G<sup>m5</sup>CGC sequences, among others, affects metabolic pathways, competence and  
83 adherence to gastric epithelial cells. Moreover, we provide specific evidence that methylation of motifs  
84 within promoter sequences can play a direct role in gene expression, while the regulatory effects of  
85 methylated sites outside of promoter region may be indirect.

## 86 MATERIAL AND METHODS

### 87 Bacterial culture, growth curves and transformation experiments

88 *H. pylori* strains were cultured on blood agar plates (41), or in liquid cultures as described (9).  
89 Microaerobic conditions were generated in airtight jars (Oxoid, Wesel, Germany) with Anaerocult C  
90 gas producing bags (Merck, Darmstadt, Germany). For growth curves, liquid cultures were inoculated  
91 with bacteria grown on agar plates for 22-24 h to a starting OD<sub>600</sub> of ~0.06 and incubated with shaking  
92 (37°C, 140 rpm, microaerobic conditions). The OD<sub>600</sub> was repeatedly measured until a maximum  
93 incubation time of 72 hours.  
94 Susceptibility to copper was tested by adding copper sulphate (final concentrations, 0.25 mM and  
95 0.50 mM) to liquid cultures. The OD<sub>600</sub> was measured 24 hours after inoculation.  
96 For transformation experiments, liquid cultures of the recipient strain were grown overnight (conditions  
97 described above). Then, 1 µg/ml of donor bacterial genomic DNA (gDNA) was added to the cultures.  
98 The donor gDNA for transformation experiments was purified from isogenic *H. pylori* strains carrying a  
99 chloramphenicol (CAT) resistance cassette within the non-essential *rdxA* gene (i.e. J99 *rdxA::CAT*).  
100 After gDNA addition, the cultures were incubated for 6-8 hours under the same conditions (37°C, 140  
101 rpm, microaerobic atmosphere). Next, the OD<sub>600</sub> was measured and adjusted to the same number of  
102 cells (OD<sub>600</sub> = 1 as 3x10<sup>8</sup> bacteria). Finally, 100 µl of serial dilutions were plated onto blood agar  
103 plates containing chloramphenicol, and incubated at 37°C under microaerobic conditions.  
104 Approximately 4-5 days later, colonies were counted and the efficiency of transformation was  
105 calculated as cfu/ml.

### 106 DNA and RNA extraction

107 gDNA was isolated from bacteria grown on blood agar plates using the Genomic-tip 100/G kit  
108 (Qiagen, Hilden, Germany) following the manufacturer's protocol. The gDNA pellet was dissolved  
109 over night at room temperature with EB buffer.  
110 For RNA extraction, 5 ml of bacterial cells grown in liquid medium were pelleted (4°C, 6000 x g, 3  
111 min), snap-frozen in liquid nitrogen and stored at -80 °C. Afterwards, bacterial pellets were disrupted  
112 with a FastPrep® FP120 Cell Disrupter (Thermo Savant) using Lysing Matrix B 2 ml tubes containing  
113 0.1 mm silica beads (MP Biomedicals, Eschwege, Germany). Isolation of RNA was performed using

114 the RNeasy kit (Qiagen, Hilden, Germany) and on-column DNase digestion with DNase I. A second  
115 DNase treatment was carried out using the TURBO DNA-free™ Kit (Ambion, Kaufungen, Germany).  
116 Isolated RNA was checked for the absence of DNA contamination by PCR reaction.

117 DNA and RNA concentrations were measured using a NanoDrop 2000 spectrophotometer (Peqlab  
118 Biotechnologies). RNA quality given as RINe number was measured with an Agilent 4200 Tape  
119 Station system using RNA Screen Tapes (Agilent, Waldbronn, Germany). All the RINe numbers were  
120 higher than 8.2, suggesting a low amount of degradation products.

### 121 **Construction of mutants and complementation**

122 Inactivation of the MTase or the whole R-M system genes was carried out by insertion of an *aphA3*  
123 cassette conferring resistance to kanamycin (Km). A PCR product was constructed using a  
124 combination of primers which added restriction sites and allowed overlap PCR with the *aphA3*  
125 cassette (Q5 Polymerase, NEB, Frankfurt am Main, Germany). Ligation of the overlap amplicon with a  
126 digested pUC19 vector was done using the Quick Ligase (NEB, Frankfurt am Main, Germany). The  
127 resulting plasmids were transformed into *E. coli* MC1061. Following plasmid isolation, 750 ng of the  
128 plasmids were used for *H. pylori* transformation. Functional complementation of the MTase gene in  
129 the strains 26695-mut and J99-mut was achieved by means of the pADC/CAT suicide plasmid  
130 approach, as described (42). Transformation of the recipient strains with the resulting plasmids  
131 permitted the chromosomal integration of the MTase gene (from 26695) into the urease locus, placing  
132 the inserted gene under the control of the strong promoter of the *H. pylori* urease operon. The  
133 complemented strains are designated 26695-compl and J99-compl, respectively.

134 Domain mutants carrying point mutations within GCGC motifs were constructed using the Multiplex  
135 Genome editing (MuGent) technique as described (9,43), with the exception that we used only a CAT  
136 cassette within the non-essential *rdxA* locus as selective marker. Sanger sequencing was used to  
137 verify the acquisition of the desired mutations within the GCGC motifs. The putative promoter of the  
138 gene was predicted using the BPROM Softberry online tool (44). All *H. pylori* mutants were checked  
139 via PCR and selected on antibiotic-containing plates. The absence or recovery of methylation was  
140 checked by digestion of gDNA with HhaI (NEB, Frankfurt am Main, Germany). All plasmids and  
141 primers used in this study are listed on the Supplementary Tables 6 and 7.

### 142 **Microscopy**

143 Live and Dead (L/D) staining was performed using the BacLight Bacterial Viability kit (Thermo Fisher  
144 Scientific, Darmstadt, Germany) according to the manufacturer's instructions. Bacteria were harvested  
145 from plates incubated for 22-24 h, and suspended in 1 ml of BHI medium without serum to an  
146 adjusted OD<sub>600</sub> of ~0.1. Then, 100 µl of this dilution were mixed with the BacLight dyes, giving green  
147 and red fluorescence for live and dead/dying bacteria, respectively. After 30 minutes of incubation at  
148 room temperature and in the dark, 0.5 µl of the mix was suspended on slides that were analyzed with  
149 an Olympus BX61-UCB microscope equipped with an Olympus DP74 digital camera. Between 80 and  
150 100 pictures from at least two independent biological and technical replicates were obtained and  
151 analyzed with the CellSens 1.17 software (Olympus Life Science) and ImageJ (45).

152

153 Gram staining was performed as follows: 300  $\mu$ l of liquid cultures grown over-night were pelleted  
154 (6,000 x g, 3 minutes, room temperature) and washed 3 times with PBS (6,000 x g, 3 minutes, room  
155 temperature). Afterwards, 100  $\mu$ l of the pellets suspended in PBS were added to a glass slide that  
156 was dried at 37°C during 10-15 minutes, heat-fixed, and Gram-stained.

### 157 **Bacterial cell adherence assays**

158 Cell adherence assays were performed as previously described with slight modifications (46,47). *H.*  
159 *pylori* strains grown to an OD<sub>600</sub> ~1 were suspended in RPMI 1640 medium supplemented with 10%  
160 fetal calf serum (FCS). Experiments were executed in 96 well plates containing 2x10<sup>5</sup> fixed AGS cells  
161 (ATCC CRL-1739) per well. AGS cells were fixed with 2% paraformaldehyde in 100 mM potassium  
162 phosphate buffer (pH=7) and subsequently quenched and washed as described (46). Live *H. pylori*  
163 bacteria were added to cells at a bacteria:cell ratio of 50 (47), followed by brief centrifugation (300 x g,  
164 5 min), and co-incubated for 1 h at 37°C with 5% CO<sub>2</sub>. After this, plates were washed twice with PBS,  
165 followed by overnight fixation with 50  $\mu$ l of fixing solution (see above). Fixing solution was renewed  
166 once and incubated for an additional 30 min, and quenched twice with 50  $\mu$ l of quenching buffer for 15  
167 min. Bacterial adherence to the AGS cells was quantitated as follows: cells were washed three times  
168 with washing buffer PBS-T (PBS + 0.05% Tween20), blocked for 30 min with 200  $\mu$ l of the assay  
169 diluent (10% FCS in PBS-T) and washed four times with PBS-T. Then, 100  $\mu$ l of a 1:2,500 dilution of  
170 the primary antibody  $\alpha$ -*H. pylori* (DAKO/Agilent, Hamburg, Germany) were added and incubated for 2  
171 h. Afterwards, cells were washed and incubated with 100  $\mu$ l of a 1:10,000 dilution of the secondary  
172 antibody, goat anti-rabbit HRP (Jackson ImmunoResearch, Ely, United Kingdom) for 1 h. After four  
173 final wash steps, the 96- well plates were finally incubated with 100  $\mu$ l TMB substrate solution (1:1,  
174 Thermo Fisher Scientific, Darmstadt, Germany). The reaction was developed in the dark for 30 min  
175 and stopped with 50  $\mu$ l of phosphoric acid (1 M). Absorbance was measured at 450/540 nm  
176 (Sunrise™ Absorbance Reader). Negative controls (mock-coincubated, fixed AGS cells) were treated  
177 the same way with primary and secondary antibody dilutions.

### 178 **Bioinformatic analyses**

179 To analyze the conservation and the genomic context of the JHP1050 MTase gene in a diverse  
180 collection of *H. pylori* strains, we assembled a database consisting of 459 *H. pylori* genomes that  
181 included strains from all known phylogeographic populations and subpopulations (Supplementary  
182 Table 1). The nucleotide sequence of gene *jhp1050* from the *H. pylori* strain J99 was used to identify  
183 and extract the *jhp1050* homologs and the sequences of the flanking genes. The NCBI blastn  
184 microbes and StandAlone Blast tools were used to extract the sequences from publicly available  
185 genomes and private genomes, respectively.

186 To study whether the methylated cytosines of the GCGC motifs had a higher tendency to deaminate  
187 (<sup>m5</sup>C>T) than unmethylated cytosines, we compared the frequency of C>T transitions to either C>A or  
188 C>G polymorphisms inside and outside of GCGC motifs among a phylogeographically distinct set of  
189 *H. pylori* genomes. GCGC motifs were identified in two *H. pylori* genomes, 26695 and PeCan18,

190 which were subsequently used as reference and aligned separately against 11 other *H. pylori*  
191 genomes using BioNumerics version 7.6 (Applied Maths, Sint-Martens-Latem, Belgium).  
192 Polymorphisms were called in both alignments and pooled together. The percentage of mutated <sup>m5</sup>C  
193 positions within GCGC motifs was determined for each possible transition or transversion as follows:

$$\% = \frac{\text{number of } ^{m5}\text{C} \rightarrow \text{base} * 100}{\text{total of motifs in the reference}}$$

194 Since the G<sup>m5</sup>C<sub>2</sub>GC motif is palindromic, the same analysis was made for the complementary strand,  
195 where the position of the second G (<sup>m5</sup>C in the complementary strand) was compared for each  
196 possible mutation and calculated as above.

197 Finally, the percentage of mutated C outside GCGC motifs calculated as follows for each possible  
198 mutation:

$$\% = \frac{(\text{Total number of C} \rightarrow \text{base} - \text{number of } ^{m5}\text{C} \rightarrow \text{base}) * 100}{\text{Total number of C in the reference genome}}$$

### 199 **Predicted sites**

200 The predicted number of motifs per kb was calculated as follows:

201

$$\text{predicted sites/kb} = \frac{\text{Total observed GCGC motifs} * 1000 \text{ (bp)}}{\text{genome length (bp)}}$$

202

203 The predicted number of motifs/kb was 3.89 (J99), 3.91 (BCM-300), 3.76 (26695) and 3.74 (H1). The  
204 expected number of motifs within CDS can then be calculated using the predicted number of motifs/kb  
205 and the gene length. Finally, the ratio observed/expected (O/E) motifs within CDS can be calculated  
206 to detected genes enriched for motifs presence. For example; a given gene in J99 that is 630 bp long  
207 and has two GCGC motifs (observed). The expected number of motifs within that gene would be:  
208 630\*3.89/1000 (expected). The ratio O/E would then be 0.8161 suggesting GCGC motifs are under-  
209 represented in this gene.

210

211 The GCGC motif is a 4-mer palindrome. In order to calculate the expected number of motifs that  
212 would randomly occur within the genome, the CDS and intergenic regions, we took into account the  
213 number of 4-mers in a given sequence, N-K+1 (where N means sequence length and K the motif  
214 length, in this case 4); and the frequency of G/C (0.2) and A/T (0.3). The final formula would be:  
215 (N-K+1)\*(0.2)<sup>4</sup>.

216

### 217 **RNA-Seq analysis**

218 RNA-Seq analysis was performed on an Illumina HiSeq sequencer obtaining single end reads of 50  
219 bp. Total rRNA depletion was performed prior to cDNA synthesis using a RiboZero Kit (Illumina,  
220 Germany). Isolated RNA from a total of 6x10<sup>8</sup> – 1x10<sup>9</sup> bacterial cells corresponding to log phase of

221 growth was used for sequencing. Three biological replicates were used for all the strains, except for  
222 J99-mut since one replicate had to be discarded during library preparation. Mapping of reads to a  
223 reference genome was done with Geneious 11.0.2 (48). Reads mapping multiple locations or  
224 intersecting multiple CDS were counted as partial matches (i.e. 0.5 read). Differential expression was  
225 calculated using DESeq2 (49). Fold Change (FC) of two and FDR adjusted p-value of 0.01 were used  
226 as a cut-off.

227 RNA-seq data was placed in the ArrayExpress database at EMBL-EBI ([www.ebi.ac.uk/arrayexpress](http://www.ebi.ac.uk/arrayexpress))  
228 with accession number E-MTAB-xxxx.

229

### 230 **Quantitative PCR (qPCR)**

231 One  $\mu\text{g}$  of RNA was used for cDNA synthesis using the SuperScript™ II Reverse Transcriptase  
232 (Thermo Fisher Scientific, Darmstadt, Germany) as described before (47). qPCR was performed with  
233 gene specific primers (Supplementary Table 7) and SYBR Green Master Mix (Qiagen, Hilden,  
234 Germany). Reactions were run in a BioRad CFX96 system. Standard curves were produced and  
235 samples were run as technical triplicates. For quantitative comparisons, samples were normalized to  
236 an internal 16S rRNA control qPCR.

## 237 **RESULTS**

### 238 **Distribution of the G<sup>m5</sup>CGC R-M system (JHP1049-1050) within a globally representative** 239 **collection of *H. pylori* genomes**

240 Despite the extensive inter-strain methylome diversity of *H. pylori*, a small number of motifs have  
241 been shown to be methylated in all or most of the strains (37). Here, we focused on the MTase  
242 JHP1050 (M.Hpy99III), which methylates GCGC sequences, resulting in G<sup>m5</sup>CGC motifs. Although  
243 <sup>m5</sup>C methylation is less common in prokaryotes than <sup>m6</sup>A-methylation, based on the Restriction  
244 Enzyme Database (REBASE) (50), this particular motif is highly conserved in many bacterial species.  
245 We therefore hypothesized that the Gm5CGC-specific MTase in *H. pylori* might play an important role  
246 apart from self-DNA protection.

247 We first analyzed the conservation and the genomic context of the MTase gene. The nucleotide  
248 sequence of gene *jhp1050* from the *H. pylori* strain J99 was used to identify the *jhp1050* homologs  
249 and the sequences of the flanking genes in a collection of 458 *H. pylori* genomes representing all  
250 known phylogeographic populations (Supplementary Table 1).

251 Based on the gene sequences, the M.Hpy99III MTase was predicted to be active in all *H. pylori*  
252 strains. The analyzed region of the chromosome was highly conserved among the strains and all the  
253 flanking genes were present with the exception of the cognate REase gene (*jhp1049*) which was  
254 present in only 61 of the 459 strains. Interestingly, the majority of the REase-positive strains belong to  
255 populations with substantial African ancestry, particularly to hpAfrica2, followed by hspSAfrica,  
256 hspWAfrica and hpEurope. Furthermore, none of the analyzed hspAsia2 or hspEAsia strains carried  
257 the REase gene (Supplementary Table 1). Only 15 REase genes were predicted to be functional,  
258 while the others were pseudogenes due to premature stop codons and/or frameshift mutations

259 (Supplementary Table 2). We identified a 10 bp repeat sequence flanking the REase gene. The same  
260 sequence was found downstream of the MTase gene and 48 bp upstream of *jhp1048* in 15 of the  
261 REase-negative strains. In all cases, the sequence contained a homopolymeric region with a variable  
262 number of adenines. This suggests that the REase gene was excised from the genome. The same  
263 sequence was found in *H. cetorum* and *H. acinonychis*, the closest known relatives of *H. pylori*  
264 (Supplementary Table 3 and Supplementary Figure 1). Moreover, the phylogenetic trees of MTase  
265 and REase gene sequences in general were congruent with the global population structure of *H.*  
266 *pylori* (Figure 1) (23). This implies that the R-M system was acquired early in the history of this gastric  
267 pathogen. The REase gene appears to have been lost later during species evolution in the majority of  
268 the strains, likely before the first modern humans left Africa. Nonetheless, the REase gene could have  
269 been reintroduced in some strains (i.e. hpEurope strains) via recombination of the flanking repeats.

### 270 **Construction of MTase mutants and analysis of target motif abundance**

271 To functionally characterize this highly conserved MTase, we constructed MTase-deficient mutants.  
272 The MTase gene was disrupted in the strains 26695 (hpEurope), H1 (hspEAsia) and BCM-300  
273 (hspWAfrica) and the whole R-M system was inactivated in strain J99 (hspWAfrica), the only of the  
274 four strains that contained both MTase and REase. Genes were inactivated by insertion of an  
275 antibiotic resistance cassette. The loss of methylation was verified by restriction assays using the  
276 restriction enzyme HhaI that can only cleave unmethylated GCGC sequences (Supplementary Figure  
277 2). In the following text, mutants are named by the wild type strain name followed by –mut.  
278 Complementation of the MTase in 26695 and in J99 was performed by reintroducing the MTase gene  
279 of 26695 (see Material and Methods). The transcription of the MTase gene was tested in the four  
280 strains, and found to vary substantially between strains (Supplementary Figure 3), whether these  
281 differences between mRNA amounts have any functional implications is currently unknown.

282 Methylome comparison of the 4 strains exhibited only 4 methylated motifs shared between the strains  
283 ( $G^{m5}CGC$ ,  $G^{m6}ATC$ ,  $C^{m6}ATG$  and  $G^{m6}AGG$ ) (Supplementary Table 4). The  $G^{m5}CGC$  motif was very  
284 common in all four genomes, although the number of motifs differed between strains (Table 1). The  
285 distribution of motifs among the genomes was not uniform. We compared this observed distribution to  
286 the motif density that would be expected from a random distribution of motifs across the genomes.  
287 While the number of motifs was generally higher than expected for a random distribution, fewer motifs  
288 than predicted were found in the *cagPAI* and the plasticity zones (PZ) (Supplementary Figure 4A).  
289 Finally, we calculated the total number of GCGC motifs that would randomly occur in the genomes,  
290 the coding regions and the intergenic regions according to the nucleotide composition of *H. pylori*.  
291 The observed number of motifs in the whole genome and in the coding regions was higher than the  
292 expected number of motifs, while the calculated motifs in intergenic regions were similar to the  
293 observed number (Table 1). Therefore, coding sequences appear to display an over-representation of  
294 motifs.

### 295 **Comparative RNA-Seq transcriptome analysis of *H. pylori* J99 and BCM-300 and their isogenic** 296 **MTase mutants**



297 Due to the extraordinary conservation of the G<sup>m5</sup>CGC MTase in all analyzed strains despite the  
298 absence of a cognate REase, we postulated that the function of the enzyme might be more important  
299 than simply serving for self-DNA protection. Therefore, in order to study a putative role in gene  
300 regulation, we performed comprehensive RNA-Seq analysis in the strains J99, BCM-300 and the two  
301 corresponding isogenic MTase mutants.

302 Whole transcriptome comparison of the J99-mut and J99 wt strains exhibited 225 differentially  
303 expressed genes (DEGs). 115 genes were upregulated and 110 downregulated in J99-mut compared  
304 with J99 wt (p-adjusted value < 0.01, Fold Change (FC) > 2). In contrast to J99, the transcriptomes of  
305 the BCM-300-mut and wt strains showed only 29 genes that were differentially expressed in the  
306 mutant, all of which were downregulated (p-adjusted value < 0.01, FC > 2) (Supplementary Table 5).  
307 The two mutants, J99-mut and BCM-300-mut, shared 10 downregulated genes but no upregulated  
308 genes (Table 2). Using qPCR, we confirmed some of the shared genes were significantly  
309 downregulated as shown by RNA-Seq (Supplementary Figure 5E, 5F).

310 In order to understand how the distribution of motifs could play a role in transcriptional regulation, we  
311 analysed 500 bp sequence upstream of each DEG in comparison with sequences upstream of genes  
312 that were not differentially regulated (non-DEGs), and with the number of motifs within CDS.

313 In strain BCM-300, the number of GCGC motifs located within 500 bp upstream of the start codon  
314 was higher for the 29 DEGs than for the genes that were not differentially regulated (Figure 2A). In  
315 contrast, in strain J99, the percentage of genes with three or more GCGC motifs within 500 bp  
316 upstream of the start codon was similar for DEGs and non-DEGs (Figure 2C). However, the 10 DEGs  
317 of strain J99 that were shared with BCM-300 showed the same overrepresentation of GCGC motifs  
318 observed in strain BCM-300 (Figure 2B, 2D). Furthermore, DEGs in BCM-300 displayed more motifs  
319 within their CDS than expected if GCGC motifs were distributed randomly across the whole genome,  
320 while the opposite effect occurred for the non-DEGs. The same trend was evident in J99 when we  
321 only compared the DEGs shared with BCM-300 with the rest of the genes (Supplementary Figure 6A).

322 In addition, we observed that of the 10 shared DEGs, 6 harboured GCGC motifs within the 50 bp  
323 upstream of the TSS described by Sharma and colleagues in strain 26695 (51), called here upstream  
324 region of the TSS (upTSS).

325 Sequences within the putative promoter regions immediately upstream of the TSS are likely to exert  
326 the strongest influence on transcriptional regulation. We compared the upTSS of 26695 with J99 and  
327 BCM-300 via sequence alignment. There were 48 genes in J99 and 45 in BCM-300 with motifs within  
328 the 50 bp upstream sequence (sRNA and asRNA were excluded). In J99, of the 225 DEGs, 13 genes  
329 harboured GCGC motifs within the upTSS sequence. In BCM-300, 11 of the 29 DEGs carried motifs  
330 within the upTSS. This proportion of DEGs with motifs within the upTSS suggests that the window of  
331 50 bp upstream of the TSS may play a role in transcription regulation. Indeed, the FC was slightly  
332 increased by motifs within the upTSS (Supplementary Figure 6B).

333 **Direct regulation of gene expression by <sup>m5</sup>C methylation**

334 Inactivation of the M.Hpy99III MTase had different effects on the transcriptomes of the two strains  
335 tested, with far more genes affected in strain J99 vs. the BCM-300 strain. We hypothesized that the  
336 loss of GCGC methylation might have both direct and indirect effects on transcription. In order to  
337 demonstrate a direct association between methylation and gene expression, we generated a set of  
338 mutants of strain J99 where site-specific mutations were introduced into selected GCGC motifs  
339 located within the CDS as well as in the upstream region of one gene showing strong differential  
340 regulation.

341 The selected gene for this approach (*jhp0832*) was downregulated in J99-mut (FC = 5.95). Its  
342 homolog in *H. pylori* strain 26695 was reported to be an antitoxin from a Type II Toxin-Antitoxin (TA)  
343 system (52). The cognate toxin (*jhp0831*) was also downregulated in J99-mut (FC = 3.64). The two  
344 genes belong to the same operon where the antitoxin is located upstream of the toxin. No  
345 homologous genes were found in BCM-300.

346 Two GCGC motifs were located within the 500 bp upstream window of the antitoxin gene and one  
347 within the coding sequence. Of the two motifs upstream, one was located within the uPTSS in J99 and  
348 overlapped the -10 box of the predicted promoter (Figure 3). Thus, due to the high FC and the  
349 distribution of motifs upstream and within the gene sequence, *jhp0832* seemed to be a good  
350 candidate to test the GCGC motif-dependent regulation.

351 We constructed three mutants where each of the motifs was individually changed to GAGC so that  
352 the motif could no longer be methylated (*jhp0832* mut1, *jhp0832* mut2 and *jhp0832* mut3). We also  
353 constructed two mutants (*jhp0832* mut4 and *jhp0832* mut6) where 2 out of the 3 GCGC motifs were  
354 mutated (Figure 3, Table 3). We were unable to generate a mutant carrying mutations in all 3 motifs.

355 Differential expression of *jhp0832* was determined by quantitative PCR (qPCR). Three of the mutants  
356 (*jhp0832* mut2, *jhp0832* mut4 and *jhp0832* mut6) displayed a strong downregulation of *jhp0832*  
357 expression, similar to J99-mut. Interestingly, these mutants shared the mutation in the G<sup>m5</sup>CGC motif  
358 located within the uPTSS and the predicted promoter of the gene. In contrast, modification of the  
359 motifs outside of the uPTSS did not consistently alter the expression of the gene (Figure 3).

360 **Phenotypes of *H. pylori* GCGC MTase mutants: growth, viability and shape**

361 In order to test whether the absence of <sup>m5</sup>C methylation and the associated differential transcriptomes  
362 had a role in the fitness of *H. pylori*, we determined the growth of the strains in liquid medium (Figure  
363 4A). J99-mut had a significant growth defect compared with the J99 wild type strain.

364 Complementation of the MTase gene restored the observed growth phenotype. Similarly, a significant  
365 reduction in growth was shown for BCM-300-mut at stationary phase. Although non-significant, a  
366 slight delay in growth was noted in 26695-mut and H1-mut compared to the wild type and the  
367 complemented strains.

368 Bacterial morphology serves to optimize biological functions and confers advantages to particular  
369 niches. *H. pylori* is a spiral-shaped bacterium that can enter a coccoid state under certain stress  
370 conditions (53). *H. pylori* J99-mut entered a coccoid state very early in liquid cultures. A substantial  
371 proportion of coccoid forms were visible between 6-9 hours after inoculation while they are rarely  
372 found in the wild type strain at this time point (Supplementary Figure 7A). An effect of the inactivation  
373 of JHP1050 on the morphology was not observed for the other three strains 24 hours post-inoculation  
374 (Supplementary Figure 7B). Complementation of J99-mut restored the wild type phenotype. We note  
375 that Live/Dead staining did not show a significant difference between the percentage of live vs. dead  
376 bacteria between the wild type and the mutant strains collected from 22-24 hour plates. There was a  
377 slight reduction in viability in the BCM-300-mut strain, but no differences were found in the other  
378 strains (Figure 4B). As in the liquid cultures, an increased number of rounded bacteria were noticed  
379 for J99-mut (Figure 4C).

### 380 **<sup>m5</sup>C methylation contributes to the high mutation frequency in *H. pylori***

381 *H. pylori* lacks most of the genes involved in mismatch repair (MMR) in other bacteria which is thought  
382 to be at least partially responsible for the high mutation rate of this bacterium (54,55). Deamination of  
383 <sup>m5</sup>C to thymine (T) is responsible for the most common single nucleotide mutation (56). *H. pylori* is  
384 known to have a very high mutation rate, and <sup>m5</sup>C MTases might contribute to that by increasing the  
385 number of nucleotides susceptible to deamination. To test whether <sup>m5</sup>C methylation within GCGC  
386 motifs played a role in *H. pylori* evolution by favouring deamination, we aligned whole genomes of two  
387 *H. pylori* strains (26695 and PeCan18), used as reference, against 11 other complete genome  
388 sequences (see Material and Methods for details). The results strongly supported a role of <sup>m5</sup>C  
389 methylation in *H. pylori* mutagenesis, since the percentage of C->T mutations within G<sup>m5</sup>C<sub>GC</sub> motifs  
390 was significantly higher than the overall C->T or C-> another base transition in the genomes of all the  
391 tested strains. Therefore, the <sup>m5</sup>C methylation of the common GCGC motif in all *H. pylori* strains may  
392 contribute to the high mutation rate of *H. pylori* and its overall low GC content by favouring  
393 deamination (Supplementary Figure 4B).

### 394 **Regulation of Outer Membrane Proteins (OMPs) and adherence by G<sup>m5</sup>CGC methylation is** 395 **strain-specific**

396 OMP genes represent approximately 4% of the *H. pylori* genome (57). Fourteen OMPs were found to  
397 be upregulated in J99-mut (Supplementary Table 5). Only three of these OMPs were slightly  
398 upregulated in BCM-300-mut but the FC was lower than the cut-off of 2. Confirmation of the  
399 upregulation of OMP genes was performed using qPCR in J99-mut (Supplementary Figure 5C, D).  
400 We detected either no regulation or weak upregulation in the other three mutated strains  
401 (Supplementary Figure 5C, D), which was in agreement with the transcriptome data obtained for  
402 BCM-300. A bacterial adherence assay based on coincubation of fixed AGS cells with all four wild  
403 type strains and corresponding isogenic GCGC mutants was performed. Only J99-mut had a  
404 significantly higher adherence to the cells compared to the respective wild type strain, while no  
405 significant differences in adherence were determined for the rest of the strains (Figure 5C). Taken

406 together, the increased expression of a number of OMP genes in the absence of methylation in J99  
407 might contribute to a stronger adherence of the bacteria to the cells.

#### 408 **GCGC methylation regulates natural competence in *H. pylori***

409 Natural competence is a hallmark of *H. pylori*. Competence is conferred by the ComB system, an  
410 unusual type IV secretion system related to the VirB system of *Agrobacterium tumefaciens* (58). RNA-  
411 Seq results identified three *com* genes (*comB8*, *comB9* and *comEC*) that were less transcribed in  
412 J99-mut compared to the wild type strain, but the genes were not found to be differentially regulated  
413 in BCM-300. ComB9 and ComB8 are part of the outer- and inner-membrane channels of the DNA  
414 uptake system, while ComEC allows the translocation of the DNA through the inner membrane to the  
415 cytoplasm. qPCR confirmed the downregulation of these genes in 26695-mut and H1-mut strains in  
416 comparison with the respective wild type strains (Supplementary Figure 5A, 5B).

417 The DNA uptake capacity of the four mutated strains was quantitated by counting recombinant  
418 colonies carrying an antibiotic resistance cassette after standardized transformation experiments (see  
419 Materials and Methods). A significant reduction in the efficiency of transformation to chloramphenicol  
420 resistance was observed in the J99, 26695 and H1 mutants compared to their respective wild type  
421 strains, but no difference was apparent for BCM-300 (Figure 5A). The down-regulation of these three  
422 components of the ComB system might be sufficient to reduce the competence in three of the strains.

#### 423 **Loss of <sup>m5</sup>C methylation increases susceptibility to copper toxicity.**

424 Copper (Cu) is an essential metal used by *H. pylori* as a cofactor in multiple processes and it has  
425 been shown, for example, to be important for colonization (59). However, an excess of heavy metals  
426 can be toxic for the bacterial cells, leading to the existence of several mechanisms to control Cu  
427 homeostasis. One of the mechanisms involves the two-component system CrdR/S. In the presence of  
428 Cu, the sensor kinase CrdS phosphorylates the response regulator CrdR triggering the activation of a  
429 copper resistance protein and a copper efflux complex (60).

430 The transcriptional regulator gene *crdR* was less expressed in both J99 and BCM-300 MTase  
431 mutants (Table 2). In both strains, one GCGC motif is located within the upTSS of the transcriptional  
432 regulator, suggesting a direct regulation via <sup>m5</sup>C methylation. To test whether the mutated strains were  
433 less resistant to Cu due to the lower expression of the *crdR* gene, we compared the influence of  
434 added copper sulphate on growth in liquid culture between MTase mutants and wild type strains. The  
435 presence of Cu caused a clear growth defect of the mutants when compared with the wild type strains,  
436 and with a control culture without added Cu (Figure 5B). The results indicates that <sup>m5</sup>C methylation  
437 within the upTSS is required to ensure sufficient transcription of the transcriptional regulator to protect  
438 against an excess of copper.

#### 439 **DISCUSSION**

440 Most previous studies of R-M systems in *Helicobacter pylori* have focussed on the striking diversity of  
441 methylation patterns and its implications. In contrast to the dozens of MTases only present in subsets  
442 of strains, *H. pylori* also possesses few enzymes that are highly conserved between strains. Here, we

443 have explored the function of one <sup>m5</sup>C MTase (JHP1050) that we predicted to be active in all of a  
444 globally representative collection of 459 *H. pylori* strains analysed. The collection included isolates  
445 from the most ancestral *H. pylori* population, hpAfrica2, and the presence of the MTase in all *H. pylori*  
446 phylogeographic populations and subpopulations indicates that the gene has been part of the *H.*  
447 *pylori* core genome since before the Out of Africa migrations, and before the *cag* pathogenicity island  
448 was acquired (23). The cognate REase gene was detected in few strains only, almost all of which  
449 belong to African *H. pylori* populations. This indicates that the REase was excised from the genome  
450 very early in the history of this gastric pathogen. These data designate strong selective pressure to  
451 maintain the activity of the MTase, while the REase gene either lost its function or was completely  
452 deleted. The apparent strong selection of the maintenance of this MTase in the *H. pylori* genome was  
453 in striking contrast to the cognate REase and to the vast majority of R-M systems so far identified in *H.*  
454 *pylori*, indicating that the MTase alone is likely to serve an important function for the bacterium. Since  
455 methylation has been shown to influence gene expression in several bacterial species, we considered  
456 a regulatory function most likely, and performed global transcriptome analysis using RNA-Seq.

457 The results obtained by RNA-Seq analysis of two *H. pylori* wild type strains, J99 and BCM-300, and  
458 their respective MTase mutants confirmed our hypothesis that GCGC methylation affects the  
459 transcription of multiple *H. pylori* genes, but we were surprised by the substantial differences between  
460 the two strains. While there were 225 DEGs in J99, whose transcription was significantly changed in  
461 the MTase mutant, only 29 genes showed an altered expression in BCM-300, and only 10 DEGs were  
462 shared between both strains.

463 To better understand the relationship between GCGC methylation and transcriptional gene regulation,  
464 we studied the correlation between the presence of GCGC motifs within coding sequences and  
465 upstream regulatory sequences and the effect of a loss of methylation on transcription.

466 DEGs were more likely to contain more than three motifs in the 500 bp sequence upstream of the  
467 start codon than the genes not showing significant differential regulation (Figure 2). Among the DEGs,  
468 the presence of GCGC motifs within the upTSS was significantly associated with higher fold change  
469 (FC) values (Supplementary Figure 6B). Moreover, there were more DEGs with higher number of  
470 motifs within the coding sequence than expected when compared with the non-DEGs (Supplementary  
471 Figure 6A). These results are similar to reports from *Vibrio cholerae*, where a significant correlation  
472 between differential regulation and the number of motifs within the coding sequence was reported for  
473 a <sup>m5</sup>C MTase (21).

474 Six of the 10 DEGs shared between J99 and BCM-300 contained GCGC motifs within the upTSS. We  
475 therefore investigated the relationship between the presence of a methylatable GCGC sequence and  
476 gene transcription using site directed mutagenesis. When the methylated G<sup>m5</sup>CGC motif within the  
477 promoter of the DEG *jhp0832* was changed to a non-methylated GAGC motif, this caused a clear  
478 down-regulation of the transcription that was similar to the effect of MTase inactivation (Figure 3). This  
479 provides strong and direct evidence that methylation of the GCGC motif within a promoter sequence

480 affects gene transcription. Similar findings were previously reported for G<sup>m6</sup>ACC motifs methylated by  
481 the *H. pylori* ModH5 MTase, which are involved in the control of the activity of the *flaA* promoter in  
482 strain P12 (39). The exact mechanism(s) how methylated sequence motifs within promoters and most  
483 likely also within coding sequences influence gene expression in *H. pylori* is still unknown. One  
484 emerging paradigm is exemplified by the essential cell cycle regulator GcrA from *Caulobacter*  
485 *crenscentus*, a  $\sigma$ 70 cofactor that binds to almost all  $\sigma$ 70 promoters, but only induces transcription of  
486 genes that harbour G<sup>m6</sup>ANTC methylated sites in their promoters (61).

487 The 10 DEGs shared by both strains were less expressed in the absence of methylation. Thus, in  
488 contrast to eukaryotes, where CpG methylation in promoter regions leads to the silencing of genes,  
489 methylation of GCGC sites in *H. pylori* promoters enhances transcription. Many of the shared DEG  
490 belong to conserved cellular pathways (i.e. biotin synthesis, Fe(ii) uptake, molybdopterin biosynthesis,  
491 bicarbonate and proton production, tRNA modification) and also include a transcriptional regulator  
492 involved in copper resistance. Based on these observations, we propose that the conserved GCGC-  
493 specific MTase directly controls the expression of those genes involved in various, partially  
494 fundamental, cellular pathways.

495 The inactivation of the MTase caused a substantial growth defect and accelerated conversion to  
496 coccoid cells in *H. pylori* J99 that were restored to wild type growth in a complemented strain. The  
497 three other wild type strains investigated did not show a similar growth defect when the MTase was  
498 inactivated. Other phenotypic effects induced by the MTase inactivation were observed in all or  
499 multiple strains. They included functions important for virulence, such as morphology, competence  
500 and adherence to gastric epithelial cells. The genome diversity of *H. pylori*, the distribution of motifs  
501 among the genomes and the variable methylomes due to the activity of other MTases must influence  
502 global gene expression. It was demonstrated recently that deletions of two strain-specific MTases, the  
503 <sup>m5</sup>C MTase M.HpyAVIB (62) and the <sup>m4</sup>C MTase M2.HpyAII (63) both also had regulatory effects on  
504 the *H. pylori* transcriptome. While the effects differed widely from those observed for the M.Hpy99III  
505 MTase studied here, there were some genes differentially regulated by more than one MTase,  
506 suggesting that the effects of different MTases may be interlinked. Thus, the strain-specific  
507 phenotypes observed in the absence of <sup>m5</sup>C methylation in GCGC motifs are likely to reflect the  
508 complex and intrinsic diversity of *H. pylori* at the genome, methylome, and transcriptome levels.

509 While we clearly showed that methylation of a GCGC motif overlapping the promoter within the  
510 upTSS directly affected transcription, we currently do not understand how the presence or absence of  
511 GCGC methylation can affect so many genes in strain J99, and which mechanisms contribute to  
512 strain-variable effects. It seems likely that at least some of the massive changes observed in strain  
513 J99 are indirect effects, e.g. resulting from the downregulation of genes affecting growth. The effect of  
514 MTase inactivation in any given strain is likely to be the net outcome of interlinked direct and indirect  
515 regulatory effects that will need to be further elucidated in the future. Methylation may affect DNA  
516 topology, which has a strong influence on genome-wide gene regulation, causing secondary effects  
517 on the global transcriptome by a plethora of mechanisms. For example, modifications of DNA

518 topology affect the binding of DnaA to the OriC2 of *H. pylori* (64). The *flaA* promoter, whose  
519 expression is governed mainly by the transcription factor  $\sigma^{28}$ , was shown by extensive mutagenesis to  
520 be strongly modulated in a topology-dependent manner during the growth phase (65). This also fits to  
521 the previously described methylation-dependent indirect regulation of the *flaA* promoter (39). Finally,  
522 several direct and indirect means of methylation-mediated regulatory mechanisms might not exclude  
523 each other, generating an intricate network fine-tuning gene expression, which depends on genome-  
524 wide methylation.

## 525 CONCLUSION

526 Global changes in <sup>m5</sup>C DNA methylation patterns in *H. pylori* affect the expression of several genes  
527 directly or indirectly, which results in both strain-independent (conserved) and strain-dependent  
528 effects. Motifs situated within promoter sequences have a direct effect on transcription, while  
529 surrounding motifs might modulate the expression indirectly by, for example, altering the topology of  
530 the DNA. Furthermore, methylation of G<sup>m5</sup>CGC target sequences maintains regulated the  
531 transcription of genes involved in metabolic pathways, competence and adherence to gastric  
532 epithelial cells.

## 533 ACCESSION NUMBERS

534 RNA-Seq data will be made publicly available prior to publication in a peer-reviewed journal.

## 535 ACKNOWLEDGEMENT

536 We thank Sandra Nell for help with assembling the collection of 459 globally representative *H. pylori*  
537 genomes, and Gudrun Pfaffinger for excellent technical assistance.

## 538 FUNDING

539 This work was supported by the German Research Foundation [SFB 900/A1 and SFB 900/Z1 to S. S.  
540 and SFB 900/B6 to C.J.].

## 541 CONFLICT OF INTEREST

542 The authors declare that that they have no conflicts of interest in regard to this article.

## 543 TABLE AND FIGURES LEGENDS

544 **Table 1. Observed and expected frequencies of GCGC motifs in the genome sequences of the**  
545 **four *H. pylori* strains analysed in this study.**

546 **Table 2. Shared differentially expressed genes (DEG), displaying GCGC methylation-**  
547 **dependent transcription in *H. pylori* J99 and BCM-300.** Positive values for Fold Change (FC)  
548 indicate lower transcription in the mutants compared to the wt strains.

549 **Table 3. List of mutants carrying different point mutations modifying the GCGC motifs within**  
550 **or immediately upstream of *jhp0832*.** All mutants were constructed using the MuGent technique  
551 (see Materials and Methods) using the indicated plasmids and the *rdxA::CAT* PCR product.

552 **Figure 1. Phylogenetic analysis of the GCGC-specific R-M system JHP1050/1049**  
553 **(M.Hpy99III/Hpy99III) in *H. pylori*.** Neighbour-Joining trees based on the MTase M.Hpy99III (A) and  
554 the REase Hpy99III (B) nucleotide sequences. In both cases, strain symbols are coloured according  
555 to the phylogeographic population assignment based on seven gene MLST and STRUCTURE  
556 analysis. Circles represents strains without REase gene, while diamonds are used for strains  
557 containing both MTase and REase genes.

558 **Figure 2. Graphical representation of the percentage of genes with GCGC motifs 500 bp**  
559 **upstream of the start codon.** A) Percentage of Non-DEGs vs DEGs with motifs 500 bp upstream in  
560 BCM-300. B) DEGs in J99 shared with BCM-300 vs the rest of the genes in J99. C) Non-DEGs vs  
561 DEGs with motifs 500 bp upstream in J99. D) DEG in J99 shared with BCM-300 vs the rest of the  
562 DEG genes in J99 (All DEG). Statistics: Chi-square,  $p < 0.05$ .

563 **Figure 3. Quantification of the transcription of *jhp0832* in *H. pylori* strains J99, J99-mut and the**  
564 **J99 mutants with point mutations within the GCGC motifs.** qPCR results are represented in the  
565 right panel, 3 different biological replicates were performed. J99-mut and the 3 mutants with the  
566 GCGC motif mutated within the promoter sequence had a significantly lower expression of the gene  
567 compared to J99 wt in all the replicates. Instead, the other two mutants displayed an altered  
568 expression that did not follow a regular pattern, since the expression differed among replicates.  
569 Statistics: One-Way ANOVA,  $p < 0.05$ , bars: SD. Legend: The gene is shown as a gray arrow. The  
570 predicted promoter is represented by a black arrow. Crosses represent methylated motifs while  
571 vertical lines mean unmethylated motifs. The GCGC motifs appear in blue and the mutated motifs to  
572 GAGC are colored in pink.

573 **Figure 4. MTase JHP1050 inactivation causes phenotypic effects that vary between strains:**  
574 **Growth, viability and morphology.** A) Growth curves for four wild type strains and mutants were  
575 measured until 72 hours. A significant growth defect was observed for J99-mut when compared with  
576 J99 wt and the complemented strains. Statistics: 2-way ANOVA,  $p < 0.05$ , bars: Standard-Deviation  
577 (SD). B) Viability of the strains was studied using epifluorescence microscopy after Live/Dead staining.  
578 Similar viability was observed in all the cases. Statistics: 2-way ANOVA,  $p < 0.05$ , bars: SD. C)  
579 Bacterial morphology was quantitated using Image J from pictures of the epifluorescence microscopy.  
580 A value of 0 represents complete elongated bacteria, while a value of 1 means complete circle. In  
581 general, live bacteria (L) were more elongated than dead bacteria (D). J99-mut was significantly more  
582 rounded than J99 wt. Statistics: One-Way ANOVA,  $p < 0.05$ , bars: 95% Coefficient-Interval (CI)

583 **Figure 5. MTase JHP1050 inactivation causes phenotypic effects that vary between strains:**  
584 **Natural competence, resistance to copper, and adherence to host cells.** A) Transformation  
585 experiments were performed transforming bacteria with 1  $\mu\text{g/ml}$  of gDNA. Lower transformation



586 frequencies were observed for three of the mutated strains. No significant difference was observed for  
587 BCM-300 Statistics: Welch's unpaired t test,  $p < 0.05$ , bars: SD. B) The growth of J99 wt, J99-mut,  
588 BCM-300 wt and BCM-300-mut strains was measured 24 hours post-inoculation after addition of  
589 different concentrations of copper sulphate to the cultures. A clear growth defect can be accounted for  
590 the mutated strains when there is an excess of Cu. Data was normalized to a control culture without  
591 copper. Statistics: One-Way ANOVA,  $p < 0.05$ , bars: SD. C) Adherence of *H. pylori* wt and mutant  
592 strains to fixed AGS cells. An increase in cell adherence was observed for J99-mut, corresponding to  
593 the upregulation of multiple OMP genes in the MTase mutants. Statistics: unpaired t test,  $p < 0.05$ ,  
594 bars: SD

## 595 REFERENCES

- 596 1. Wilson, G.G. and Murray, N.E. (1991) Restriction and modification systems. *Annu. Rev.*  
597 *Genet.*, **25**, 585-627.
- 598 2. Jeltsch, A. (2002) Beyond Watson and Crick: DNA methylation and molecular enzymology of  
599 DNA methyltransferases. *Chem. Bio. Chem.*, **3**, 274-293.
- 600 3. Roberts, R.J., Belfort, M., Bestor, T., Bhagwat, A.S., Bickle, T.A., Bitinaite, J., Blumenthal,  
601 R.M., Degtyarev, S.K., Dryden, D.T., Dybvig, K. *et al.* (2003) A nomenclature for restriction  
602 enzymes, DNA methyltransferases, homing endonucleases and their genes. *Nucleic Acids*  
603 *Res.*, **31**, 1805-1812.
- 604 4. Wilson, G.G. (1991) Organization of restriction-modification systems. *Nucleic Acids. Res.*, **19**,  
605 2539-2566.
- 606 5. Loenen, W.A., Dryden, D.T., Raleigh, E.A., Wilson, G.G. and Murray, N.E. (2014) Highlights of  
607 the DNA cutters: a short history of the restriction enzymes. *Nucleic Acids. Res.*, **42**, 3-19.
- 608 6. Kong, H., Lin, L.F., Porter, N., Stickel, S., Byrd, D., Posfai, J. and Roberts, R.J. (2000) Functional  
609 analysis of putative restriction-modification system genes in the *Helicobacter pylori* J99  
610 genome. *Nucleic Acids. Res.*, **28**, 3216-3223.
- 611 7. Sanchez-Romero, M.A., Cota, I. and Casadesus, J. (2015) DNA methylation in bacteria: from  
612 the methyl group to the methylome. *Curr. Opin. Microbiol.*, **25**, 9-16.
- 613 8. Ershova, A.S., Rusinov, I.S., Spirin, S.A., Karyagina, A.S. and Alexeevski, A.V. (2015) Role of  
614 Restriction-Modification systems in prokaryotic evolution and ecology. *Biochemistry (Mosc)*.  
615 **80**, 1373-1386.
- 616 9. Bubendorfer, S., Krebs, J., Yang, I., Hage, E., Schulz, T.F., Bahlawane, C., Didelot, X. and  
617 Suerbaum, S. (2016) Genome-wide analysis of chromosomal import patterns after natural  
618 transformation of *Helicobacter pylori*. *Nat. Commun.*, **7**, 11995.
- 619 10. Nou, X., Skinner, B., Braaten, B., Blyn, L., Hirsch, D. and Low, D. (1993) Regulation of  
620 pyelonephritis-associated pili phasevariation in *Escherichia coli*: binding of the PapI and the  
621 Lrp regulatory proteins is controlled by DNA methylation. *Mol. Microbiol.*, **7**, 545-553.
- 622 11. Wion, D. and Casadesus, J. (2006) N6-methyladenine: an epigenetic signal for DNA-protein  
623 interactions. *Nat. Rev. Microbiol.*, **4**, 183-192.
- 624 12. Severin, P.M.D., Zou, X., Gaub, H.E. and Schulten, K. (2011) Cytosine methylation alters DNA  
625 mechanical properties. *Nucleic Acids Res.*, **39**, 8740-8751.
- 626 13. Messer, W., Bellekes, U. and Lothar, H. (1985) Effect of dam methylation on the activity of  
627 the *E. coli* replication origin, oriC. *EMBO J.*, **4**, 1327-1332.
- 628 14. Kang, S., Lee, H., Han, J.S. and Hwang, D.S. (1999) Interaction of SeqA and Dam methylase on  
629 the hemimethylated origin of *Escherichia coli* chromosomal DNA replication. *J. Biol. Chem.*,  
630 **274**, 11463-11468.

- 631 15. Kozdon, J.B., Melfi, M.D., Luong, K., Clark, T.A., Boitano, M., Wang, S., Zhou, B., Gonzalez, D.,  
632 Collier, J., Turner, S.W. *et al.* (2013) Global methylation state at base-pair resolution of the  
633 *Caulobacter* genome throughout the cell cycle. *PNAS*, **110**, E4658-E4667.
- 634 16. Fox, K.L., Dowideit, S.J., Erwin, A.L., Srikhanta, Y.N., Smith, A.L. and Jennings, M.P. (2007)  
635 *Haemophilus influenzae* phasevarions have evolved from type III DNA restriction systems  
636 into epigenetic regulators of gene expression. *Nucleic Acids. Res.*, **35**, 5242-5252.
- 637 17. Srikhanta, Y.N., Dowideit, S.J., Edwards, J.L., Falsetta, M.L., Wu, H.J., Harrison, O.B., Fox, K.L.,  
638 Seib, K.L., Maguire, T.L., Wang, A.H. *et al.* (2009) Phasevarions mediate random switching of  
639 gene expression in pathogenic *Neisseria*. *PLoS Pathog.*, **5**, e1000400.
- 640 18. Srikhanta, Y.N., Fox, K.L. and Jennings, M.P. (2010) The phasevarion: phase variation of Type  
641 III DNA methyltransferases controls coordinated switching in multiple genes. *Nat. Rev.*  
642 *Microbiol.*, **8**, 196-206.
- 643 19. Srikhanta, Y.N., Maguire, T.L., Stacey, K.J., Grimmond, S.M. and Jennings, M.P. (2005) The  
644 phasevarion: a genetic system controlling coordinated, random switching of expression of  
645 multiple genes. *PNAS*, **102**, 5547-5551.
- 646 20. Kahramanoglou, C., Prieto, A.I., Khedkar, S., Haase, B., Gupta, A., Benes, V., Fraser, G.M.,  
647 Luscombe, N.M. and Seshasayee, A.S. (2012) Genomics of DNA cytosine methylation in  
648 *Escherichia coli* reveals its role in stationary phase transcription. *Nat. Commun.*, **3**, 886.
- 649 21. Chao, M.C., Zhu, S., Kimura, S., Davis, B.M., Schadt, E.E., Fang, G. and Waldor, M.K. (2015) A  
650 cytosine methyltransferase modulates the cell envelope stress response in the cholera  
651 pathogen. *PLoS Genet.*, **11**, e1005739.
- 652 22. Suerbaum, S. and Michetti, P. (2002) *Helicobacter pylori* infection. *N. Engl. J. Med.*, **347**,  
653 1175-1186.
- 654 23. Moodley, Y., Linz, B., Bond, R.P., Nieuwoudt, M., Soodyall, H., Schlebusch, C.M., Bernhoft, S.,  
655 Hale, J., Suerbaum, S., Mugisha, L. *et al.* (2012) Age of the association between *Helicobacter*  
656 *pylori* and man. *PLoS Pathog.*, **8**, e1002693.
- 657 24. Suerbaum, S., Maynard Smith, J., Bapumia, K., Morelli, G., Smith, N.H., Kunstmann, E., Dyrek,  
658 I. and Achtman, M. (1998) Free recombination within *Helicobacter pylori*. *PNAS*, **95**, 12619-  
659 12624.
- 660 25. Falush, D., Kraft, C., Taylor, N.S., Correa, P., Fox, J.G., Achtman, M. and Suerbaum, S. (2001)  
661 Recombination and mutation during long-term gastric colonization by *Helicobacter pylori*:  
662 estimates of clock rates, recombination size, and minimal age. *PNAS*, **98**, 15056-15061.
- 663 26. Didelot, X., Nell, S., Yang, I., Woltemate, S., van der, M.S. and Suerbaum, S. (2013) Genomic  
664 evolution and transmission of *Helicobacter pylori* in two South African families. *PNAS*, **110**,  
665 13880-13885.
- 666 27. Falush, D., Wirth, T., Linz, B., Pritchard, J.K., Stephens, M., Kidd, M., Blaser, M.J., Graham,  
667 D.Y., Vacher, S., Perez-Perez, G.I. *et al.* (2003) Traces of human migrations in *Helicobacter*  
668 *pylori* populations. *Science*, **299**, 1582-1585.
- 669 28. Linz, B., Balloux, F., Moodley, Y., Manica, A., Liu, H., Roumagnac, P., Falush, D., Stamer, C.,  
670 Prugnolle, F., van der Merwe, S.W. *et al.* (2007) An african origin for the intimate association  
671 between humans and *Helicobacter pylori*. *Nature*, **445**, 915-918.
- 672 29. Moodley, Y., Linz, B., Yamaoka, Y., Windsor, H.M., Breurec, S., Wu, J.Y., Maady, A., Bernhoft,  
673 S., Thiherge, J.M., Phuanukoonnon, S. *et al.* (2009) The peopling of the Pacific from a  
674 bacterial perspective. *Science*, **323**, 527-530.
- 675 30. Vasu, K. and Nagaraja, V. (2013) Diverse functions of restriction-modification systems in  
676 addition to cellular defense. *Microbiol. Mol. Biol. Rev.*, **77**, 53-72.
- 677 31. Roberts, R.J., Carneiro, M.O. and Schatz, M.C. (2013) The advantages of SMRT sequencing.  
678 *Genome Biol.*, **14**, 405.

- 679 32. Flusberg, B.A., Webster, D.R., Lee, J.H., Travers, K.J., Olivares, E.C., Clark, T.A., Korlach, J. and  
680 Turner, S.W. (2010) Direct detection of DNA methylation during Single-Molecule, Real-Time  
681 sequencing. *Nat. Methods*, **7**, 461-465.
- 682 33. Krebes, J., Morgan, R.D., Bunk, B., Sproer, C., Luong, K., Parusel, R., Anton, B.P., Konig, C.,  
683 Josenhans, C., Overmann, J. *et al.* (2014) The complex methylome of the human gastric  
684 pathogen *Helicobacter pylori*. *Nucleic Acids Res.*, **42**, 2415-2432.
- 685 34. Nell, S., Estibariz, I., Krebes, J., Bunk, B., Graham, D.Y., Overmann, J., Song, Y., Spröer, C.,  
686 Yang, I., Wex, T. *et al.* (2018) Genome and methylome variation in *Helicobacter pylori* with a  
687 cag Pathogenicity Island during early stages of human infection. *Gastroenterology*, **154**, 612-  
688 623.
- 689 35. Furuta, Y., Namba-Fukuyo, H., Shibata, T.F., Nishiyama, T., Shigenobu, S., Suzuki, Y., Sugano,  
690 S., Hasebe, M. and Kobayashi, I. (2014) Methylome diversification through changes in DNA  
691 methyltransferase sequence specificity. *PLoS Genet.*, **10**, e1004272.
- 692 36. Lee, W.C., Anton, B.P., Wang, S., Baybayan, P., Singh, S., Ashby, M., Chua, E.G., Tay, C.Y.,  
693 Thirriot, F., Loke, M.F. *et al.* (2015) The complete methylome of *Helicobacter pylori* UM032.  
694 *BMC Genomics*, **16**, 424.
- 695 37. Vale, F.F., Megraud, F. and Vitor, J.M. (2009) Geographic distribution of methyltransferases  
696 of *Helicobacter pylori*: evidence of human host population isolation and migration. *BMC*  
697 *Microbiol.*, **9**, 193.
- 698 38. Srikhanta, Y.N., Gorrell, R.J., Steen, J.A., Gawthorne, J.A., Kwok, T., Grimmond, S.M., Robins-  
699 Browne, R.M. and Jennings, M.P. (2011) Phasevarion mediated epigenetic gene regulation in  
700 *Helicobacter pylori*. *PLoS One*, **6**, e27569.
- 701 39. Srikhanta, Y.N., Gorrell, R.J., Power, P.M., Tsyganov, K., Boitano, M., Clark, T.A., Korlach, J.,  
702 Hartland, E.L., Jennings, M.P. and Kwok, T. (2017) Methylomic and phenotypic analysis of the  
703 ModH5 phasevarion of *Helicobacter pylori*. *Sci. Rep.*, **7**, 16140.
- 704 40. Xu, Q., Morgan, R.D., Roberts, R.J. and Blaser, M.J. (2000) Identification of Type II restriction  
705 and modification systems in *Helicobacter pylori* reveals their substantial diversity among  
706 strains. *PNAS*, **97**, 9671-9676.
- 707 41. Moccia, C., Krebes, J., Kulick, S., Didelot, X., Kraft, C., Bahlawane, C. and Suerbaum, S. (2012)  
708 The nucleotide excision repair (NER) system of *Helicobacter pylori*: role in mutation  
709 prevention and chromosomal import patterns after natural transformation. *BMC Microbiol.*,  
710 **12**, 67.
- 711 42. Huang, S., Kang, J. and Blaser, M.J. (2006) Antimutator role of the DNA glycosylase *mutY*  
712 gene in *Helicobacter pylori*. *J. Bacteriol.*, **188**, 6224-6234.
- 713 43. Dalia, A.B., McDonough, E. and Camilli, A. (2014) Multiplex genome editing by natural  
714 transformation. *PNAS*, **111**, 8937-8942.
- 715 44. Solovyev, V. and Salamov, A. (2011) Automatic annotation of microbial genomes and  
716 metagenomic sequences. In metagenomics and its applications in agriculture, biomedicine  
717 and environmental Studies (Ed. R.W. Li), . *Nova Science Publishers*, 61-78.
- 718 45. Schneider, C.A., Rasband, W.S. and Eliceiri, K.W. (2012) NIH image to ImageJ: 25 years of  
719 image analysis. *Nat. Methods*, **9**, 671-675.
- 720 46. Bönig, T., Olbermann, P., Bats, S.H., Fischer, W. and Josenhans, C. (2016) Systematic site-  
721 directed mutagenesis of the *Helicobacter pylori* CagL protein of the Cag type IV secretion  
722 system identifies novel functional domains. *Sci. Rep.*, **6**, 38101.
- 723 47. Stein, S.C., Faber, E., Bats, S.H., Murillo, T., Speidel, Y., Coombs, N. and Josenhans, C. (2017)  
724 *Helicobacter pylori* modulates host cell responses by CagT4SS-dependent translocation of an  
725 intermediate metabolite of LPS inner core heptose biosynthesis. *PLoS Pathog.*, **13**,  
726 e1006514.
- 727 48. Kears, M., Moir, R., Wilson, A., Stones-Havas, S., Cheung, M., Sturrock, S., Buxton, S.,  
728 Cooper, A., Markowitz, S., Duran, C. *et al.* (2012) Geneious Basic: an integrated and

- 729 extendable desktop software platform for the organization and analysis of sequence data.  
730 *Bioinformatics*, **28**, 1647-1649.
- 731 49. Love, M.I., Huber, W. and Anders, S. (2014) Moderated estimation of fold change and  
732 dispersion for RNA-seq data with DESeq2. *Genome Biol.*, **15**, 550.
- 733 50. Roberts, R.J., Vincze, T., Posfai, J. and Macelis, D. (2015) REBASE--a database for DNA  
734 restriction and modification: enzymes, genes and genomes. *Nucleic Acids Res.*, **43**, D298-  
735 D299.
- 736 51. Sharma, C.M., Hoffmann, S., Darfeuille, F., Reignier, J., Findeiß, S., Sittka, A., Chabas, S.,  
737 Reiche, K., Hackermüller, J., Reinhardt, R. *et al.* (2010) The primary transcriptome of the  
738 major human pathogen *Helicobacter pylori*. *Nature*, **464**, 250-255.
- 739 52. Han, K.D., Ahn, D.H., Lee, S.A., Min, Y.H., Kwon, A.R., Ahn, H.C. and Lee, B.J. (2013)  
740 Identification of chromosomal HP0892-HP0893 Toxin-Antitoxin proteins in *Helicobacter*  
741 *pylori* and structural elucidation of their protein-protein interaction. *J. Biol. Chem.*, **288**,  
742 6004-6013.
- 743 53. Azevedo, N.F., Almeida, C., Cerqueira, L., Dias, S., Keevil, C.W. and Vieira, M.J. (2007) Coccoid  
744 form of *Helicobacter pylori* as a morphological manifestation of cell adaptation to the  
745 environment. *Appl. Environ. Microbiol.*, **73**, 3423-3427.
- 746 54. Tomb, J.F., White, O., Kerlavage, A.R., Clayton, R.A., Sutton, G.G., Fleischmann, R.D.,  
747 Ketchum, K.A., Klenk, H.P., Gill, S., Dougherty, B.A. *et al.* (1997) The complete genome  
748 sequence of the gastric pathogen *Helicobacter pylori*. *Nature*, **388**, 539-547.
- 749 55. Dorer, M.S., Sessler, T.H. and Salama, N.R. (2011) Recombination and DNA repair in  
750 *Helicobacter pylori*. *Annu. Rev. Microbiol.*, **65**, 329-348.
- 751 56. Hershberg, R. and Petrov, D.A. (2011) Evidence that mutation is universally biased towards  
752 AT in bacteria. *PLoS Genet.*, **6**, e1001115.
- 753 57. Dossumbekova, A., Prinz, C., Gerhard, M., Brenner, L., Backert, S., Kusters, J.G., Schmid, R.M.  
754 and Rad, R. (2006) *Helicobacter pylori* outer membrane proteins and gastric inflammation.  
755 *Gut*, **55**, 1360-1361.
- 756 58. Hofreuter, D., Odenbreit, S. and Haas, R. (2001) Natural transformation competence in  
757 *Helicobacter pylori* is mediated by the basic components of a Type IV secretion system. *Mol.*  
758 *Microbiol.*, **41**, 379-391.
- 759 59. Montefusco, S., Esposito, R., D'Andrea, L., Monti, M.C., Dunne, C., Dolan, B., Tosco, A.,  
760 Marzullo, L. and Clyne, M. (2013) Copper promotes TFF1-mediated *Helicobacter pylori*  
761 colonization. *PLoS One*, **8**, e79455.
- 762 60. Haley, K.P. and Gaddy, J.A. (2015) Metalloregulation of *Helicobacter pylori* physiology and  
763 pathogenesis. *Front. Microbiol.*, **6**, 911.
- 764 61. Haakonsen, D.L., Yuan, A.H. and Laub, M.T. (2015) The bacterial cell cycle regulator GcrA is a  
765  $\sigma$ 70 cofactor that drives gene expression from a subset of methylated promoters. *Genes*  
766 *Dev.*, **29**, 2272-2286.
- 767 62. Kumar, R., Mukhopadhyay, A.K., Ghosh, P. and Rao, D.N. (2012) Comparative transcriptomics  
768 of *H. pylori* strains AM5, SS1 and their *hpyAV/IBM* deletion mutants: possible roles of cytosine  
769 methylation. *PLoS One*, **7**, e42303.
- 770 63. Kumar, S., Karmakar, B.C., Nagarajan, D., Mukhopadhyay, A.K., Morgan, R.D. and Rao, D.N.  
771 (2018) N4-cytosine DNA methylation regulates transcription and pathogenesis in  
772 *Helicobacter pylori*. *Nucleic Acids Res.*, **46**, 3429-3445.
- 773 64. Donczew, R., Weigel, C., Lurz, R., Zakrzewska-Czerwinska, J. and Zawilak-Pawlik, A. (2012)  
774 *Helicobacter pylori* oriC—the first bipartite origin of chromosome replication in Gram-  
775 negative bacteria. *Nucleic Acids Res.*, **40**, 9647-9660.
- 776 65. Ye, F., Brauer, T., Niehus, E., Drlica, K., Josenhans, C. and Suerbaum, S. (2007) Flagellar and  
777 global gene regulation in *Helicobacter pylori* modulated by changes in DNA supercoiling. *Int.*  
778 *J. Med. Microbiol.*, **297**, 65-81.

779

780 **Table 1.**

| Strain  | Genome size (bp) | Total length of CDS (bp) | Total length of intergenic sequences (bp) | Predicted no. of GCGC sites/1kb | No. of motifs in genome | Expected no. of motifs in genome | No. of motifs in CDS | Expected no. of motifs in CDS | No. of motifs in intergenic sequences | Expected no. of motifs in intergenic sequences |
|---------|------------------|--------------------------|-------------------------------------------|---------------------------------|-------------------------|----------------------------------|----------------------|-------------------------------|---------------------------------------|------------------------------------------------|
| 26695   | 1667867          | 1494807                  | 173060                                    | 3.76                            | 6269                    | 2669                             | 5950                 | 2392                          | 319                                   | 277                                            |
| J99     | 1643831          | 1486413                  | 157418                                    | 3.89                            | 6399                    | 2630                             | 6110                 | 2378                          | 289                                   | 252                                            |
| H1      | 1563305          | 1436409                  | 126896                                    | 3.74                            | 5846                    | 2501                             | 5655                 | 2298                          | 191                                   | 203                                            |
| BCM-300 | 1667883          | 1520688                  | 147195                                    | 3.91                            | 6523                    | 2669                             | 6273                 | 2433                          | 250                                   | 236                                            |

781

782

783 **Table 2.**

| Gene        | Description                                   | J99 locus_tag   | J99 FC | BCM-300 locus_tag | BCM-300 FC |
|-------------|-----------------------------------------------|-----------------|--------|-------------------|------------|
| <i>bioD</i> | Dethiobiotin synthetase                       | <i>jhp_0025</i> | 2.1986 | <i>BCM_00034</i>  | 2.9978     |
|             |                                               |                 |        | <i>BCM_00035</i>  | 2.9424     |
| <i>feoB</i> | iron(II) transport protein                    | <i>jhp_0627</i> | 3.8803 | <i>BCM_00707</i>  | 4.3250     |
| -           | unknown                                       | <i>jhp_0749</i> | 3.8245 | <i>BCM_00859</i>  | 3.1947     |
| <i>moeB</i> | molybdopterin/thiamine biosynthesis activator | <i>jhp_0750</i> | 4.0863 | <i>BCM_00860</i>  | 3.6033     |
| -           | unknown                                       | <i>jhp_1102</i> | 2.4868 | <i>BCM_01112</i>  | 2.2810     |
| <i>cah</i>  | Alpha-carbonic anhydrase                      | <i>jhp_1112</i> | 2.0723 | <i>BCM_01124</i>  | 3.3563     |
| <i>trmU</i> | tRNA-methyltransferase                        | <i>jhp_1254</i> | 4.5288 | <i>BCM_01276</i>  | 5.7005     |
| -           | unknown                                       | <i>jhp_1281</i> | 3.4690 | <i>BCM_01305</i>  | 2.0216     |
| -           | unknown                                       | <i>jhp_1253</i> | 2.9141 | <i>BCM_01275</i>  | 3.2789     |
| <i>crdR</i> | Response regulator                            | <i>jhp_1283</i> | 2.8855 | <i>BCM_01307</i>  | 3.2789     |
|             |                                               | <i>jhp_1443</i> | 2.9141 |                   |            |

784

785

786

787

788

789 **Table 3.**

| <b>Mutant name</b>  | <b>GCGC motif mutated</b> | <b>Plasmid</b>     | <b>Antibiotic resistance cassette</b> |
|---------------------|---------------------------|--------------------|---------------------------------------|
| <i>jhp0832</i> mut1 | 1                         | pSUS3427           | CAT                                   |
| <i>jhp0832</i> mut2 | 2                         | pSUS3428           | CAT                                   |
| <i>jhp0832</i> mut3 | 3                         | pSUS3429           | CAT                                   |
| <i>jhp0832</i> mut4 | 1,2                       | pSUS3427, pSUS3428 | CAT                                   |
| <i>jhp0832</i> mut6 | 2,3                       | pSUS3428, pSUS3429 | CAT                                   |

790

791

792

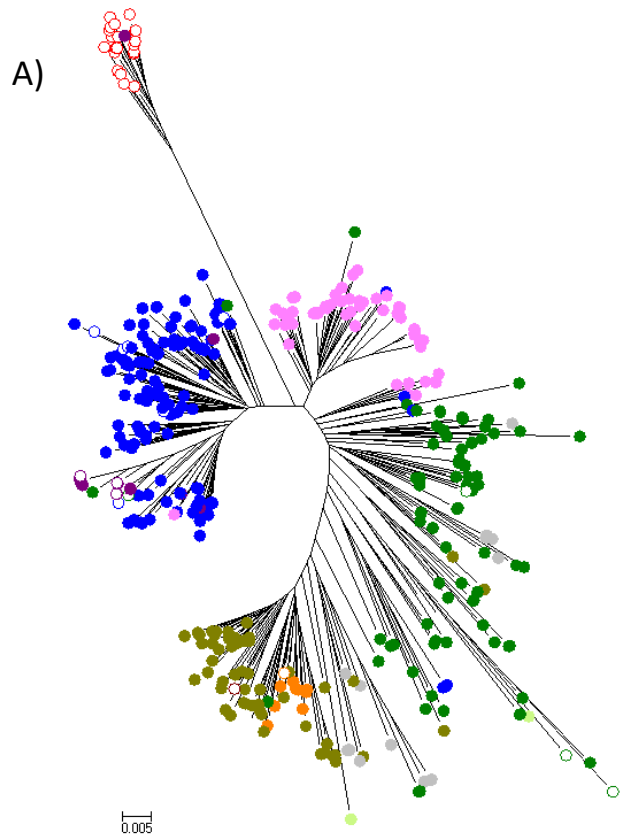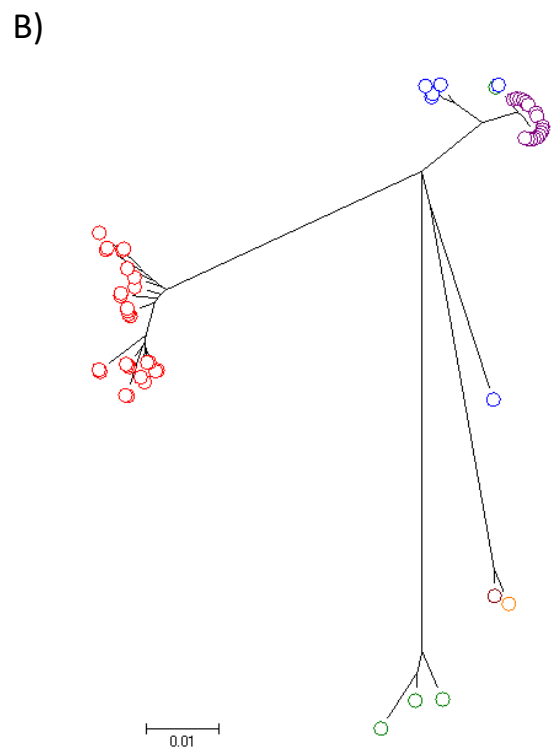

| Population        | Subpopulation                                           |
|-------------------|---------------------------------------------------------|
| <b>hpAfrica2</b>  | -                                                       |
| <b>hpAfrica1</b>  | <b>hspWAfrica</b><br><b>hspSAfrica</b>                  |
| <b>hpNEAfrica</b> | -                                                       |
| <b>hpEurope</b>   | -                                                       |
| <b>hpSahul</b>    | -                                                       |
| <b>hpEastAsia</b> | <b>hspEAsia</b><br><b>hspAmerind</b><br><b>hspMaori</b> |
| <b>hpAsia2</b>    | -                                                       |



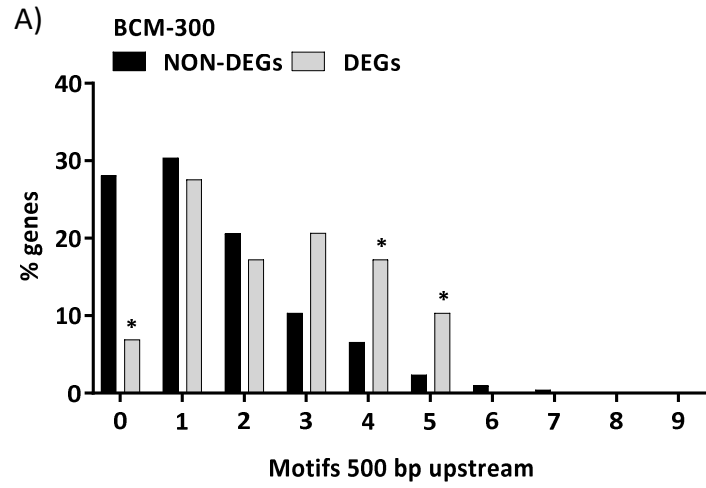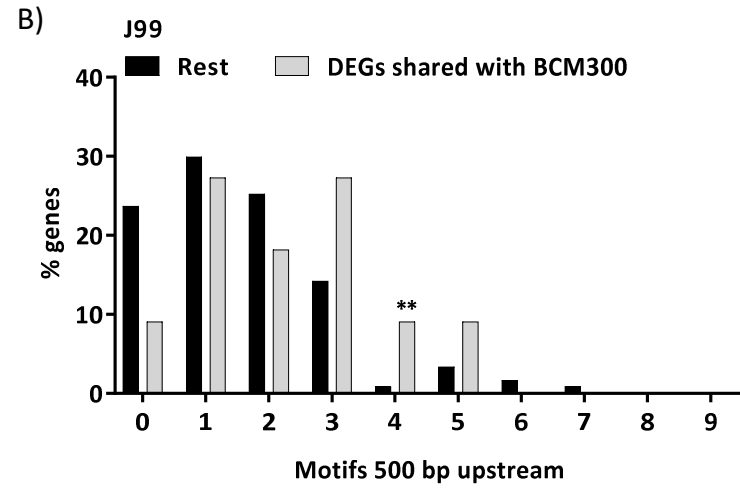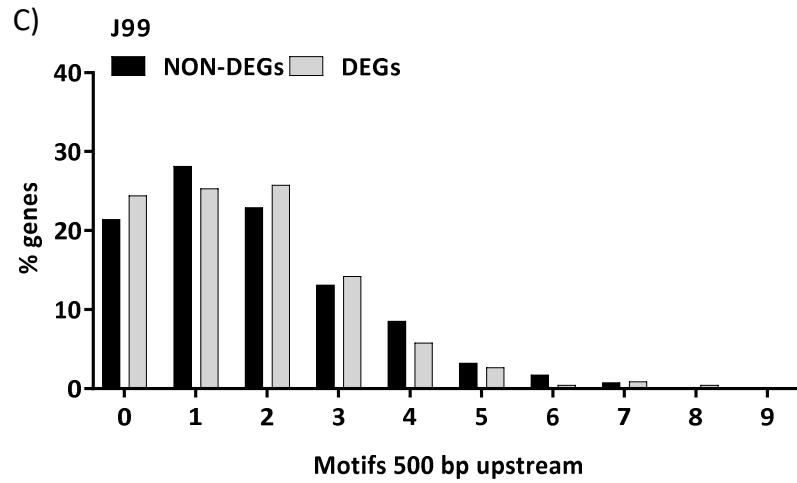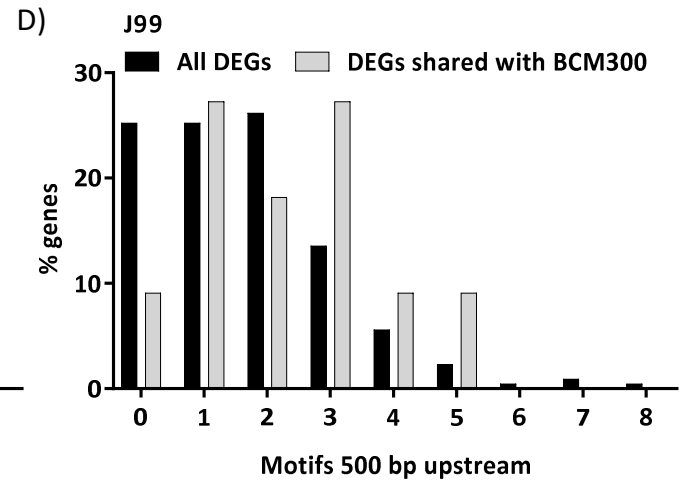

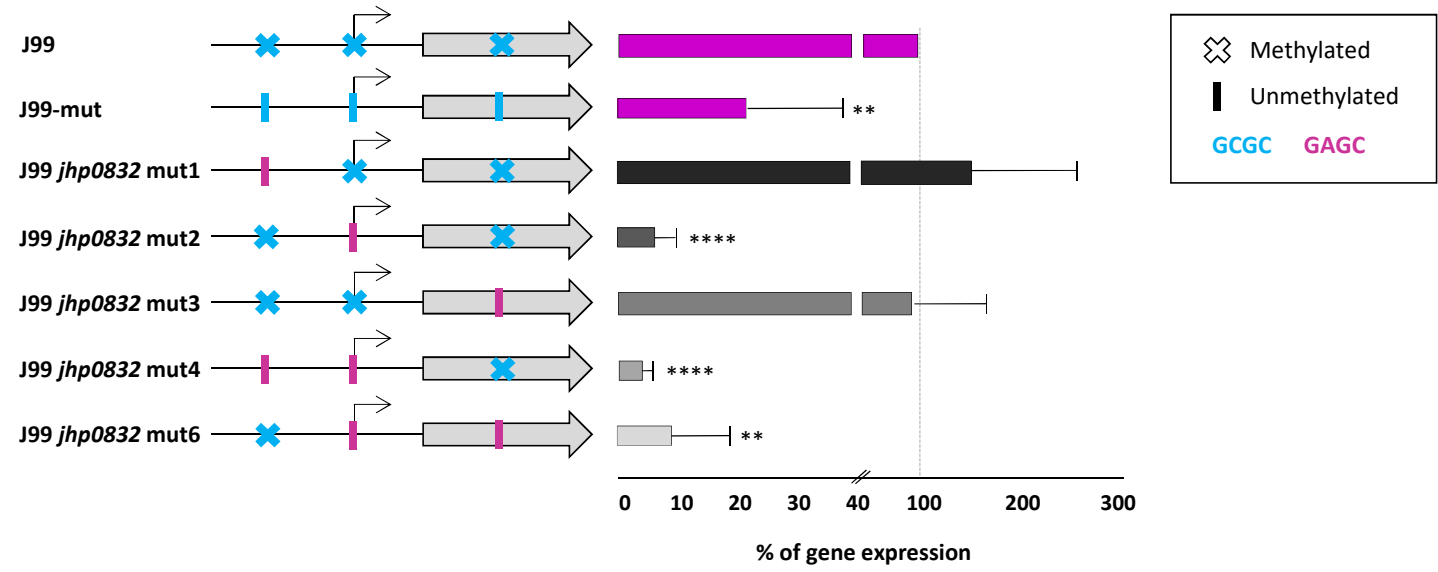

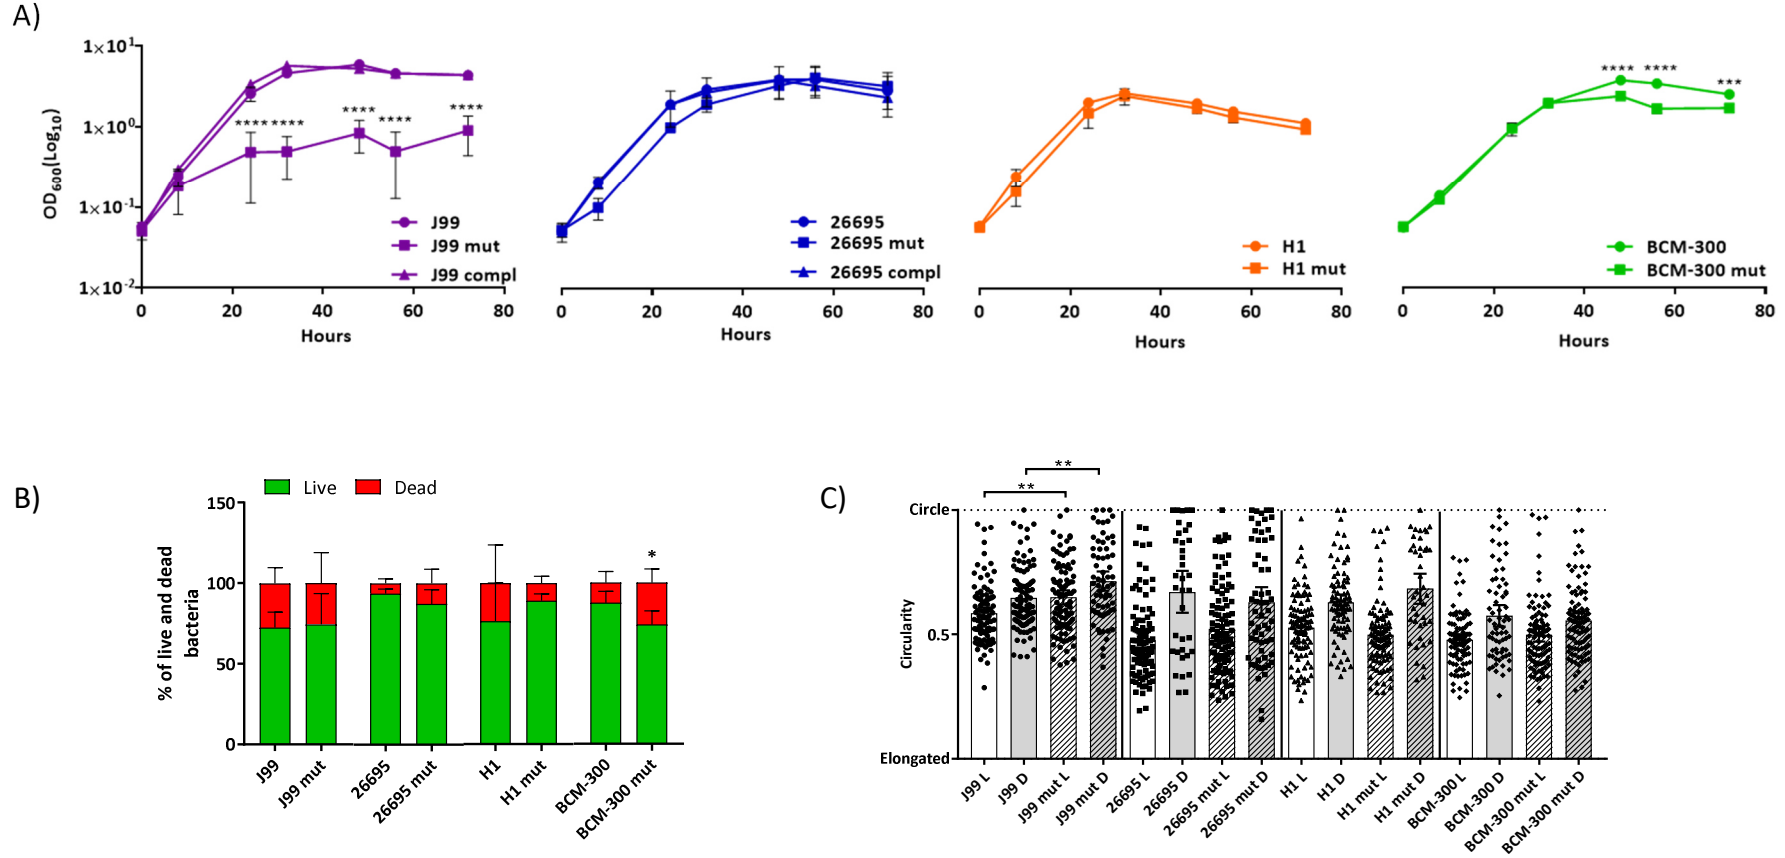

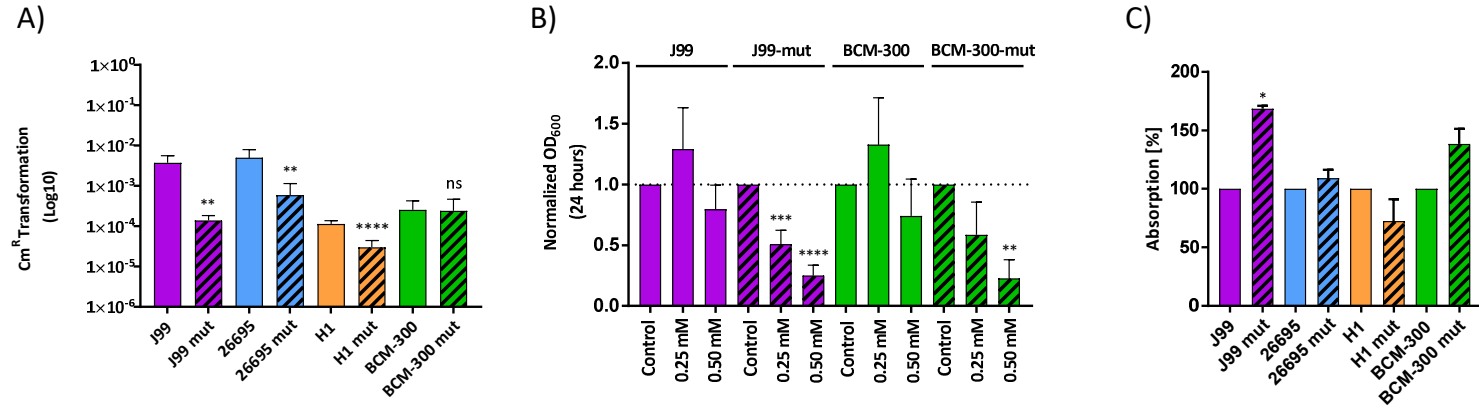

Source: http://biorxiv.org/content/10.1101/393710v1.full.pdf
